# Supplementary material for: Mitochondria Associated MicroRNA Expression Profiling of Heart Failure
Source: Biomed Res Int. 2017 Sep 24;2017:4042509. doi: 10.1155/2017/4042509 (PMC5632880; doi:10.1155/2017/4042509)
Supplement: Supplementary file 1 — Expression changes of microRNAs by RNA-seq. [file 4042509.f1.xlsx]

## Sheet: Sham-4-week-TAC
pairwise	miR-name	fold-change(log2 4-week_TAC/Sham)	p-value	sig-lable
Sham-4-week_TAC	mmu-miR-345-3p	6.67582	0.0154904	*
Sham-4-week_TAC	mmu-miR-532-5p	4.09083	9.83362e-09	**
Sham-4-week_TAC	mmu-miR-709	3.70383	0.000960843	**
Sham-4-week_TAC	mmu-miR-181b-5p	3.70383	0.000960843	**
Sham-4-week_TAC	mmu-miR-133a-3p	3.17332	0.0115867	*
Sham-4-week_TAC	mmu-miR-690	3.00339	0.0212681	*
Sham-4-week_TAC	mmu-miR-133b-3p	3.00339	0.0212681	*
Sham-4-week_TAC	mmu-miR-696	2.91028	0.00128936	**
Sham-4-week_TAC	mmu-miR-122-5p	2.86862	5.71674e-18	**
Sham-4-week_TAC	mmu-miR-181a-5p	2.81075	0.0387163	*
Sham-4-week_TAC	mmu-miR-140-3p	2.70383	0.00411799	**
Sham-4-week_TAC	mmu-miR-29c-3p	2.58835	0.00728295	**
Sham-4-week_TAC	mmu-miR-362-3p	2.58835	0.0697736
Sham-4-week_TAC	mmu-miR-132-3p	2.46294	8.07612e-06	**
Sham-4-week_TAC	mmu-miR-181d-5p	2.32532	0.0222034	*
Sham-4-week_TAC	mmu-miR-28a-3p	2.32532	0.0222034	*
Sham-4-week_TAC	mmu-miR-350-3p	2.32532	0.0222034	*
Sham-4-week_TAC	mmu-miR-365-3p	2.32532	0.0222034	*
Sham-4-week_TAC	mmu-miR-541-5p	2.32532	0.0222034	*
Sham-4-week_TAC	mmu-miR-5121	2.17332	0.0381778	*
Sham-4-week_TAC	mmu-miR-433b-3p	1.94998	1.94943e-20	**
Sham-4-week_TAC	mmu-miR-6538	1.8849	2.92994e-08	**
Sham-4-week_TAC	mmu-miR-199b-5p	1.87814	0.0347465	*
Sham-4-week_TAC	mmu-miR-375-3p	1.87814	0.0347465	*
Sham-4-week_TAC	mmu-miR-146a-5p	1.86155	0.000458967	**
Sham-4-week_TAC	mmu-miR-148b-3p	1.81096	0.0189385	*
Sham-4-week_TAC	mmu-miR-490-3p	1.81096	0.0189385	*
Sham-4-week_TAC	mmu-miR-186-3p	1.81075	0.108509
Sham-4-week_TAC	mmu-let-7d-3p	1.74774	2.60811e-07	**
Sham-4-week_TAC	mmu-miR-3095-3p	1.74064	0.0567718
Sham-4-week_TAC	mmu-miR-485-5p	1.70404	0.0304822	*
Sham-4-week_TAC	mmu-miR-204-5p	1.68163	0.0166386	*
Sham-4-week_TAC	mmu-miR-10a-5p	1.61362	5.47873e-38	**
Sham-4-week_TAC	mmu-miR-379-5p	1.58864	0.0914256
Sham-4-week_TAC	mmu-miR-31-5p	1.58849	0.0143873	*
Sham-4-week_TAC	mmu-miR-106b-3p	1.58835	0.178474
Sham-4-week_TAC	mmu-miR-17-5p	1.58835	0.178474
Sham-4-week_TAC	mmu-miR-1964-3p	1.58835	0.178474
Sham-4-week_TAC	mmu-miR-21a-5p	1.58042	1.72354e-82	**
Sham-4-week_TAC	mmu-miR-378c	1.57158	1.83617e-84	**
Sham-4-week_TAC	mmu-miR-29b-3p	1.53408	3.71597e-05	**
Sham-4-week_TAC	mmu-miR-331-3p	1.51816	0.0123139	*
Sham-4-week_TAC	mmu-miR-33-5p	1.51816	0.0123139	*
Sham-4-week_TAC	mmu-miR-144-3p	1.50301	2.17454e-29	**
Sham-4-week_TAC	mmu-miR-101b-3p	1.4784	5.89875e-26	**
Sham-4-week_TAC	mmu-miR-101a-3p	1.45124	2.01597e-81	**
Sham-4-week_TAC	mmu-miR-133a-5p	1.44098	1.03369e-05	**
Sham-4-week_TAC	mmu-miR-378a-3p	1.41594	0	**
Sham-4-week_TAC	mmu-miR-499-5p	1.38619	9.69348e-151	**
Sham-4-week_TAC	mmu-miR-30a-5p	1.36977	1.06698e-74	**
Sham-4-week_TAC	mmu-miR-93-5p	1.36612	0.00171742	**
Sham-4-week_TAC	mmu-miR-150-5p	1.35718	0.013267	*
Sham-4-week_TAC	mmu-miR-322-5p	1.35718	0.013267	*
Sham-4-week_TAC	mmu-miR-199a-5p	1.32549	8.08293e-66	**
Sham-4-week_TAC	mmu-miR-1949	1.32546	0.0517793
Sham-4-week_TAC	mmu-miR-23b-5p	1.32546	0.0517793
Sham-4-week_TAC	mmu-miR-22-3p	1.31907	4.18672e-34	**
Sham-4-week_TAC	mmu-miR-203-3p	1.29909	0	**
Sham-4-week_TAC	mmu-miR-664-5p	1.28374	0.042652	*
Sham-4-week_TAC	mmu-miR-148a-3p	1.27366	0.00149794	**
Sham-4-week_TAC	mmu-miR-210-3p	1.26395	2.13477e-13	**
Sham-4-week_TAC	mmu-miR-342-3p	1.23237	2.61031e-05	**
Sham-4-week_TAC	mmu-miR-574-3p	1.22607	0.224974
Sham-4-week_TAC	mmu-miR-7225-5p	1.22607	0.224974
Sham-4-week_TAC	mmu-miR-144-5p	1.22598	0.000304148	**
Sham-4-week_TAC	mmu-miR-15a-5p	1.21001	0.00933617	**
Sham-4-week_TAC	mmu-miR-151-3p	1.18411	0.00642956	**
Sham-4-week_TAC	mmu-miR-30a-3p	1.1769	7.82217e-12	**
Sham-4-week_TAC	mmu-miR-365-2-5p	1.17353	0.17806
Sham-4-week_TAC	mmu-miR-23a-3p	1.13427	1.15212e-30	**
Sham-4-week_TAC	mmu-miR-106b-5p	1.12912	0.0282809	*
Sham-4-week_TAC	mmu-miR-99b-5p	1.11905	1.77367e-08	**
Sham-4-week_TAC	mmu-miR-29a-3p	1.11904	6.27296e-250	**
Sham-4-week_TAC	mmu-miR-142-5p	1.11578	4.92249e-08	**
Sham-4-week_TAC	mmu-miR-340-5p	1.09102	4.81167e-05	**
Sham-4-week_TAC	mmu-miR-497-5p	1.08449	0.00117378	**
Sham-4-week_TAC	mmu-miR-143-3p	1.0834	1.09377e-38	**
Sham-4-week_TAC	mmu-miR-146b-5p	1.07885	0.000812133	**
Sham-4-week_TAC	mmu-miR-329-3p	1.07856	4.30083e-24	**
Sham-4-week_TAC	mmu-miR-503-5p	1.07681	1.14873e-05	**
Sham-4-week_TAC	mmu-miR-143-5p	1.07391	0.0492914	*
Sham-4-week_TAC	mmu-miR-191-5p	1.06226	4.54925e-50	**
Sham-4-week_TAC	mmu-miR-1291	1.00367	0.341727
Sham-4-week_TAC	mmu-miR-330-3p	1.00367	0.341727
Sham-4-week_TAC	mmu-miR-501-3p	1.00367	0.341727
Sham-4-week_TAC	mmu-miR-127-3p	1.00358	0.0566726
Sham-4-week_TAC	mmu-miR-186-5p	1.00358	0.0859572
Sham-4-week_TAC	mmu-miR-486-3p	0.992593	2.90015e-06
Sham-4-week_TAC	mmu-miR-200b-5p	0.982191	0.000943898
Sham-4-week_TAC	mmu-miR-322-3p	0.977163	3.56413e-15
Sham-4-week_TAC	mmu-miR-26a-5p	0.968097	9.87492e-26
Sham-4-week_TAC	mmu-miR-208a-5p	0.962913	0.0193607
Sham-4-week_TAC	mmu-miR-25-3p	0.948703	1.94406e-32
Sham-4-week_TAC	mmu-miR-128-3p	0.946984	1.96004e-07
Sham-4-week_TAC	mmu-miR-1940	0.944182	1.90717e-05
Sham-4-week_TAC	mmu-miR-107-3p	0.939778	1.2934e-50
Sham-4-week_TAC	mmu-miR-1a-3p	0.933996	0
Sham-4-week_TAC	mmu-miR-30e-5p	0.928467	9.66266e-06
Sham-4-week_TAC	mmu-miR-103-3p	0.922041	8.65299e-85
Sham-4-week_TAC	mmu-miR-434-3p	0.921117	0.120533
Sham-4-week_TAC	mmu-miR-3107-5p	0.915836	3.8297e-22
Sham-4-week_TAC	mmu-miR-125a-5p	0.91582	2.67749e-11
Sham-4-week_TAC	mmu-miR-486-5p	0.913573	5.01925e-22
Sham-4-week_TAC	mmu-miR-139-5p	0.896656	0.0198985
Sham-4-week_TAC	mmu-miR-30d-5p	0.896649	1.88457e-27
Sham-4-week_TAC	mmu-miR-92a-3p	0.896647	0.000348238
Sham-4-week_TAC	mmu-miR-99b-3p	0.892374	6.15278e-12
Sham-4-week_TAC	mmu-miR-15b-5p	0.888074	0.0717426
Sham-4-week_TAC	mmu-miR-872-5p	0.888074	0.0717426
Sham-4-week_TAC	mmu-miR-139-3p	0.878053	0.0150033
Sham-4-week_TAC	mmu-miR-192-5p	0.876913	7.713e-21
Sham-4-week_TAC	mmu-miR-99a-5p	0.867754	2.39631e-08
Sham-4-week_TAC	mmu-miR-16-5p	0.867687	3.32468e-06
Sham-4-week_TAC	mmu-miR-221-5p	0.866076	0.108634
Sham-4-week_TAC	mmu-miR-598-3p	0.851557	0.134303
Sham-4-week_TAC	mmu-miR-223-3p	0.851557	0.299499
Sham-4-week_TAC	mmu-miR-199a-3p	0.843555	7.53754e-109
Sham-4-week_TAC	mmu-miR-199b-3p	0.843555	7.53754e-109
Sham-4-week_TAC	mmu-miR-125b-5p	0.842171	2.87972e-15
Sham-4-week_TAC	mmu-miR-24-3p	0.841531	3.39957e-23
Sham-4-week_TAC	mmu-miR-152-3p	0.831612	7.13557e-19
Sham-4-week_TAC	mmu-miR-130a-3p	0.825228	0.00233988
Sham-4-week_TAC	mmu-miR-676-3p	0.821364	0.000384519
Sham-4-week_TAC	mmu-miR-222-3p	0.740526	0.0335279
Sham-4-week_TAC	mmu-miR-27b-3p	0.740524	0.000163187
Sham-4-week_TAC	mmu-miR-22-5p	0.726043	0.0744178
Sham-4-week_TAC	mmu-miR-126a-5p	0.71052	0.00121388
Sham-4-week_TAC	mmu-miR-30c-5p	0.696385	0.00104402
Sham-4-week_TAC	mmu-miR-26b-5p	0.69246	6.86232e-15
Sham-4-week_TAC	mmu-miR-27a-3p	0.692213	0.000439204
Sham-4-week_TAC	mmu-miR-23b-3p	0.691625	0.0012346
Sham-4-week_TAC	mmu-miR-185-5p	0.691137	1.45403e-24
Sham-4-week_TAC	mmu-miR-674-5p	0.688052	0.0462189
Sham-4-week_TAC	mmu-miR-10b-5p	0.681632	0.245158
Sham-4-week_TAC	mmu-miR-181c-5p	0.681632	0.245158
Sham-4-week_TAC	mmu-miR-17-3p	0.681632	0.421238
Sham-4-week_TAC	mmu-miR-1839-5p	0.674458	6.59665e-10
Sham-4-week_TAC	mmu-miR-345-5p	0.65571	0.356441
Sham-4-week_TAC	mmu-miR-194-5p	0.641009	0.304576
Sham-4-week_TAC	mmu-miR-200c-3p	0.588565	0.380201
Sham-4-week_TAC	mmu-miR-138-5p	0.588565	0.546044
Sham-4-week_TAC	mmu-miR-382-3p	0.588565	0.546044
Sham-4-week_TAC	mmu-miR-1981-5p	0.588537	0.158158
Sham-4-week_TAC	mmu-miR-744-5p	0.588521	0.0729922
Sham-4-week_TAC	mmu-miR-3064-5p	0.588495	0.451484
Sham-4-week_TAC	mmu-miR-374b-5p	0.588495	0.451484
Sham-4-week_TAC	mmu-let-7i-5p	0.567962	4.51789e-21
Sham-4-week_TAC	mmu-miR-151-5p	0.54419	0.341578
Sham-4-week_TAC	mmu-miR-25-5p	0.54419	0.341578
Sham-4-week_TAC	mmu-miR-34c-5p	0.534081	0.0152174
Sham-4-week_TAC	mmu-miR-195a-5p	0.518124	0.145174
Sham-4-week_TAC	mmu-miR-215-5p	0.488987	0.577953
Sham-4-week_TAC	mmu-miR-1a-2-5p	0.488947	0.320318
Sham-4-week_TAC	mmu-miR-511-3p	0.488947	0.320318
Sham-4-week_TAC	mmu-miR-6240	0.481612	1.01094e-06
Sham-4-week_TAC	mmu-miR-30b-5p	0.477477	0.287472
Sham-4-week_TAC	mmu-miR-221-3p	0.476052	0.00138153
Sham-4-week_TAC	mmu-miR-466i-5p	0.473072	0.3733
Sham-4-week_TAC	mmu-miR-669c-5p	0.451081	0.438237
Sham-4-week_TAC	mmu-miR-3473b	0.407962	0.214404
Sham-4-week_TAC	mmu-miR-3473e	0.39061	0.468868
Sham-4-week_TAC	mmu-miR-30c-2-3p	0.375533	0.162964
Sham-4-week_TAC	mmu-miR-145a-5p	0.329549	0.15128
Sham-4-week_TAC	mmu-miR-423-5p	0.289152	0.00284668
Sham-4-week_TAC	mmu-miR-92b-3p	0.266595	0.771071
Sham-4-week_TAC	mmu-miR-3470b	0.251493	0.123229
Sham-4-week_TAC	mmu-let-7g-5p	0.228048	6.29508e-08
Sham-4-week_TAC	mmu-miR-451a	0.227286	0.012567
Sham-4-week_TAC	mmu-miR-149-3p	0.225924	0.786906
Sham-4-week_TAC	mmu-miR-30e-3p	0.202861	0.5963
Sham-4-week_TAC	mmu-miR-320-3p	0.183422	0.00428504
Sham-4-week_TAC	mmu-miR-98-5p	0.141068	0.754593
Sham-4-week_TAC	mmu-miR-335-5p	0.11908	0.840043
Sham-4-week_TAC	mmu-let-7f-5p	0.0337461	0.00355181
Sham-4-week_TAC	mmu-miR-100-5p	0.0035604	0.992269
Sham-4-week_TAC	mmu-let-7b-5p	-0.00787953	0.675847
Sham-4-week_TAC	mmu-let-7c-5p	-0.0518782	1.55218e-05
Sham-4-week_TAC	mmu-miR-3471	-0.078883	0.873817
Sham-4-week_TAC	mmu-let-7d-5p	-0.0860251	0.0292943
Sham-4-week_TAC	mmu-miR-3470a	-0.1391	0.243596
Sham-4-week_TAC	mmu-miR-8094	-0.166346	0.741433
Sham-4-week_TAC	mmu-miR-299a-5p	-0.170468	0.448643
Sham-4-week_TAC	mmu-let-7a-5p	-0.199727	7.75003e-27
Sham-4-week_TAC	mmu-let-7e-5p	-0.210356	0.00380789
Sham-4-week_TAC	mmu-miR-3535	-0.218855	0.589347
Sham-4-week_TAC	mmu-miR-1194	-0.318368	0.651529
Sham-4-week_TAC	mmu-miR-181a-2-3p	-0.411435	0.61064
Sham-4-week_TAC	mmu-miR-27b-5p	-0.481794	0.584164
Sham-4-week_TAC	mmu-miR-126a-3p	-0.481897	0.256487
Sham-4-week_TAC	mmu-miR-214--3p	-0.737134	7.29534e-16
Sham-4-week_TAC	mmu-miR-208a-3p	-0.803762	0.123194
Sham-4-week_TAC	mmu-miR-145a-3p	-1.06684	0.00530992	**
Sham-4-week_TAC	mmu-miR-200b-3p	-2.9964	0.0217025	*

## Sheet: Sham-8-week-TAC
pairwise	miR-name	fold-change(log2 8-week_TAC/Sham)	p-value	sig-lable
Sham-8-week_TAC	mmu-miR-6538	3.54852	5.29087e-45	**
Sham-8-week_TAC	mmu-miR-299a-5p	3.21129	0.0102574	*
Sham-8-week_TAC	mmu-miR-199a-5p	3.04141	0.0190761	*
Sham-8-week_TAC	mmu-miR-5126	3.04141	0.0190761	*
Sham-8-week_TAC	mmu-miR-532-5p	3.04136	0.000584005	**
Sham-8-week_TAC	mmu-miR-148a-3p	2.87806	5.56869e-18	**
Sham-8-week_TAC	mmu-miR-208a-3p	2.74182	0.00349814	**
Sham-8-week_TAC	mmu-miR-7225-5p	2.04169	0.0182702	*
Sham-8-week_TAC	mmu-miR-6516-3p	2.04141	0.0587599
Sham-8-week_TAC	mmu-miR-5121	1.8487	0.099604
Sham-8-week_TAC	mmu-miR-712-5p	1.8487	0.099604
Sham-8-week_TAC	mmu-miR-133b-3p	1.82293	3.62058e-17	**
Sham-8-week_TAC	mmu-miR-28a-3p	1.62637	0.16591
Sham-8-week_TAC	mmu-miR-146a-5p	1.50101	0.00847126	**
Sham-8-week_TAC	mmu-miR-709	1.48215	1.64181e-09	**
Sham-8-week_TAC	mmu-miR-1949	1.45654	0.0292038	*
Sham-8-week_TAC	mmu-miR-29b-3p	1.3635	0.0004034	**
Sham-8-week_TAC	mmu-miR-6240	1.27525	2.01743e-49	**
Sham-8-week_TAC	mmu-miR-690	1.06596	5.01933e-09	**
Sham-8-week_TAC	mmu-miR-199b-5p	1.04169	0.320623
Sham-8-week_TAC	mmu-miR-29c-3p	1.00478	6.99855e-12	**
Sham-8-week_TAC	mmu-miR-466i-5p	0.926092	0.0598439
Sham-8-week_TAC	mmu-miR-1940	0.815293	0.000331857
Sham-8-week_TAC	mmu-let-7d-3p	0.807131	0.0452843
Sham-8-week_TAC	mmu-miR-31-5p	0.778515	0.303239
Sham-8-week_TAC	mmu-miR-101b-3p	0.73939	4.13444e-06
Sham-8-week_TAC	mmu-miR-3473e	0.733462	0.149768
Sham-8-week_TAC	mmu-miR-378c	0.732712	6.3067e-15
Sham-8-week_TAC	mmu-miR-101a-3p	0.681596	6.03155e-15
Sham-8-week_TAC	mmu-miR-342-3p	0.656278	0.0441529
Sham-8-week_TAC	mmu-miR-485-5p	0.626583	0.516802
Sham-8-week_TAC	mmu-miR-214-3p	0.626466	0.420056
Sham-8-week_TAC	mmu-miR-499-5p	0.621809	1.83004e-24
Sham-8-week_TAC	mmu-miR-3470a	0.613992	5.50734e-09
Sham-8-week_TAC	mmu-miR-3470b	0.579007	0.000188247
Sham-8-week_TAC	mmu-miR-208a-5p	0.57208	0.196909
Sham-8-week_TAC	mmu-miR-27b-5p	0.556224	0.443045
Sham-8-week_TAC	mmu-miR-345-5p	0.556224	0.443045
Sham-8-week_TAC	mmu-miR-133a-3p	0.554836	4.52866e-10
Sham-8-week_TAC	mmu-miR-143-3p	0.543869	3.43259e-09
Sham-8-week_TAC	mmu-miR-29a-3p	0.543085	3.80847e-49
Sham-8-week_TAC	mmu-miR-223-3p	0.526946	0.54537
Sham-8-week_TAC	mmu-miR-3471	0.515511	0.24957
Sham-8-week_TAC	mmu-miR-497-5p	0.511066	0.168997
Sham-8-week_TAC	mmu-miR-15a-5p	0.511043	0.334408
Sham-8-week_TAC	mmu-miR-3107-5p	0.466155	5.98992e-06
Sham-8-week_TAC	mmu-miR-486-5p	0.466155	5.98992e-06
Sham-8-week_TAC	mmu-miR-23b-5p	0.456587	0.568212
Sham-8-week_TAC	mmu-miR-378a-3p	0.421037	1.15963e-32
Sham-8-week_TAC	mmu-miR-331-3p	0.404175	0.586937
Sham-8-week_TAC	mmu-miR-1a-2-5p	0.382593	0.446685
Sham-8-week_TAC	mmu-miR-511-3p	0.382593	0.446685
Sham-8-week_TAC	mmu-miR-3473b	0.380381	0.251543
Sham-8-week_TAC	mmu-miR-27b-3p	0.377172	0.0731129
Sham-8-week_TAC	mmu-miR-674-5p	0.321673	0.384179
Sham-8-week_TAC	mmu-miR-30a-5p	0.295735	0.00113323
Sham-8-week_TAC	mmu-miR-23a-3p	0.292118	0.0109188
Sham-8-week_TAC	mmu-miR-744-5p	0.289499	0.404611
Sham-8-week_TAC	mmu-miR-3064-5p	0.263883	0.748597
Sham-8-week_TAC	mmu-miR-128-3p	0.261698	0.204447
Sham-8-week_TAC	mmu-miR-99a-5p	0.260745	0.133595
Sham-8-week_TAC	mmu-miR-26a-5p	0.255699	0.0149962
Sham-8-week_TAC	mmu-miR-21a-5p	0.251792	0.0156266
Sham-8-week_TAC	mmu-miR-125a-5p	0.249814	0.107555
Sham-8-week_TAC	mmu-miR-33-5p	0.234295	0.758697
Sham-8-week_TAC	mmu-miR-195a-5p	0.234209	0.532248
Sham-8-week_TAC	mmu-miR-22-3p	0.222146	0.0921483
Sham-8-week_TAC	mmu-miR-150-5p	0.1936	0.773429
Sham-8-week_TAC	mmu-miR-186-5p	0.1936	0.773429
Sham-8-week_TAC	mmu-miR-10b-5p	0.179044	0.778922
Sham-8-week_TAC	mmu-miR-143-5p	0.179044	0.778922
Sham-8-week_TAC	mmu-miR-151-5p	0.16717	0.78353
Sham-8-week_TAC	mmu-miR-221-5p	0.16717	0.78353
Sham-8-week_TAC	mmu-miR-30d-5p	0.156059	0.0987086
Sham-8-week_TAC	mmu-miR-340-5p	0.145907	0.645896
Sham-8-week_TAC	mmu-miR-24-3p	0.13822	0.151773
Sham-8-week_TAC	mmu-miR-100-5p	0.13469	0.714016
Sham-8-week_TAC	mmu-miR-503-5p	0.129041	0.656893
Sham-8-week_TAC	mmu-miR-126a-5p	0.124035	0.611405
Sham-8-week_TAC	mmu-miR-107-3p	0.111694	0.12586
Sham-8-week_TAC	mmu-miR-125b-5p	0.103413	0.396438
Sham-8-week_TAC	mmu-miR-133a-5p	0.100497	0.80756
Sham-8-week_TAC	mmu-miR-152-3p	0.0972225	0.363979
Sham-8-week_TAC	mmu-miR-99b-5p	0.0614796	0.797095
Sham-8-week_TAC	mmu-miR-221-3p	0.0594956	0.711081
Sham-8-week_TAC	mmu-miR-15b-5p	0.0415721	0.939766
Sham-8-week_TAC	mmu-miR-191-5p	0.0390232	0.648996
Sham-8-week_TAC	mmu-miR-1839-5p	0.0258638	0.832888
Sham-8-week_TAC	mmu-miR-140-3p	0.0231958	0.480662
Sham-8-week_TAC	mmu-miR-199a-3p	0.0199199	0.651976
Sham-8-week_TAC	mmu-miR-199b-3p	0.0199199	0.651976
Sham-8-week_TAC	mmu-miR-1a-3p	-0.00826837	0.0273769
Sham-8-week_TAC	mmu-miR-26b-5p	-0.0151483	0.881568
Sham-8-week_TAC	mmu-miR-185-5p	-0.0346452	0.653708
Sham-8-week_TAC	mmu-miR-30b-5p	-0.0408899	0.936848
Sham-8-week_TAC	mmu-miR-30e-5p	-0.0445836	0.86
Sham-8-week_TAC	mmu-miR-486-3p	-0.0486236	0.850851
Sham-8-week_TAC	mmu-miR-151-3p	-0.0580169	0.918366
Sham-8-week_TAC	mmu-miR-192-5p	-0.0918237	0.410874
Sham-8-week_TAC	mmu-miR-16-5p	-0.0943007	0.672337
Sham-8-week_TAC	mmu-miR-106b-5p	-0.0958641	0.885469
Sham-8-week_TAC	mmu-miR-10a-5p	-0.108319	0.525255
Sham-8-week_TAC	mmu-miR-1981-5p	-0.110429	0.818804
Sham-8-week_TAC	mmu-miR-3535	-0.121925	0.763132
Sham-8-week_TAC	mmu-let-7f-5p	-0.124906	1.85195e-25
Sham-8-week_TAC	mmu-miR-322-5p	-0.128328	0.862948
Sham-8-week_TAC	mmu-miR-222-3p	-0.128363	0.755732
Sham-8-week_TAC	mmu-miR-200c-3p	-0.151084	0.849193
Sham-8-week_TAC	mmu-let-7d-5p	-0.169957	2.49875e-05
Sham-8-week_TAC	mmu-miR-30a-3p	-0.173158	0.430361
Sham-8-week_TAC	mmu-miR-93-5p	-0.180803	0.757853
Sham-8-week_TAC	mmu-miR-30c-2-3p	-0.204582	0.496613
Sham-8-week_TAC	mmu-miR-322-3p	-0.219963	0.153383
Sham-8-week_TAC	mmu-miR-27a-3p	-0.238536	0.307183
Sham-8-week_TAC	mmu-miR-23b-3p	-0.245709	0.334044
Sham-8-week_TAC	mmu-miR-127-3p	-0.247913	0.712758
Sham-8-week_TAC	mmu-miR-25-5p	-0.247913	0.712758
Sham-8-week_TAC	mmu-let-7g-5p	-0.248598	6.9443e-08
Sham-8-week_TAC	mmu-miR-92a-3p	-0.251204	0.416997
Sham-8-week_TAC	mmu-miR-130a-3p	-0.255412	0.440394
Sham-8-week_TAC	mmu-miR-30c-5p	-0.265611	0.294636
Sham-8-week_TAC	mmu-let-7c-5p	-0.296219	5.38036e-122
Sham-8-week_TAC	mmu-miR-181d-5p	-0.316473	0.166448
Sham-8-week_TAC	mmu-miR-676-3p	-0.317508	0.26495
Sham-8-week_TAC	mmu-miR-142-5p	-0.317958	0.230307
Sham-8-week_TAC	mmu-miR-194-5p	-0.321032	0.672411
Sham-8-week_TAC	mmu-miR-145a-5p	-0.353291	0.175738
Sham-8-week_TAC	mmu-let-7a-5p	-0.359604	1.18973e-77
Sham-8-week_TAC	mmu-let-7i-5p	-0.36025	4.40125e-07
Sham-8-week_TAC	mmu-miR-320-3p	-0.364875	2.89109e-07
Sham-8-week_TAC	mmu-miR-335-5p	-0.373463	0.568833
Sham-8-week_TAC	mmu-miR-103-3p	-0.383427	1.32232e-10
Sham-8-week_TAC	mmu-let-7e-5p	-0.435381	1.06918e-08
Sham-8-week_TAC	mmu-miR-181a-5p	-0.441575	0.00158042
Sham-8-week_TAC	mmu-let-7b-5p	-0.469501	1.89932e-115
Sham-8-week_TAC	mmu-miR-22-5p	-0.473012	0.353129
Sham-8-week_TAC	mmu-miR-434-3p	-0.543366	0.490461
Sham-8-week_TAC	mmu-miR-374b-5p	-0.543413	0.581791
Sham-8-week_TAC	mmu-miR-98-5p	-0.5799	0.263832
Sham-8-week_TAC	mmu-miR-122-5p	-0.586461	0.299808
Sham-8-week_TAC	mmu-miR-126a-3p	-0.595886	0.172995
Sham-8-week_TAC	mmu-miR-146b-5p	-0.595886	0.172995
Sham-8-week_TAC	mmu-miR-30e-3p	-0.625852	0.162321
Sham-8-week_TAC	mmu-miR-139-3p	-0.636479	0.181961
Sham-8-week_TAC	mmu-miR-181b-5p	-0.671801	9.07059e-05
Sham-8-week_TAC	mmu-miR-1194	-0.695388	0.363096
Sham-8-week_TAC	mmu-miR-181c-5p	-0.695388	0.363096
Sham-8-week_TAC	mmu-miR-598-3p	-0.695388	0.363096
Sham-8-week_TAC	mmu-miR-664-5p	-0.765705	0.416154
Sham-8-week_TAC	mmu-miR-25-3p	-0.803965	1.85472e-13
Sham-8-week_TAC	mmu-miR-8094	-0.8064	0.157674
Sham-8-week_TAC	mmu-miR-144-5p	-0.842934	0.0883084
Sham-8-week_TAC	mmu-miR-872-5p	-0.85154	0.212594
Sham-8-week_TAC	mmu-miR-451a	-0.980311	4.52978e-18
Sham-8-week_TAC	mmu-miR-423-5p	-0.994767	3.53875e-16
Sham-8-week_TAC	mmu-miR-139-5p	-1.02878	0.060409
Sham-8-week_TAC	mmu-miR-34c-5p	-1.04088	0.000366115	**
Sham-8-week_TAC	mmu-miR-696	-1.35071	0.0199212	*
Sham-8-week_TAC	mmu-miR-669c-5p	-1.41779	0.086911
Sham-8-week_TAC	mmu-miR-149-3p	-1.54341	0.194282
Sham-8-week_TAC	mmu-miR-345-3p	-1.72393	0.000356153	**
Sham-8-week_TAC	mmu-miR-132-3p	-2.47141	3.2408e-88	**
Sham-8-week_TAC	mmu-miR-181a-2-3p	-2.95879	0.0241482	*
Sham-8-week_TAC	mmu-miR-200b-3p	-7.08725	0.00444296	**

## Sheet: 4 week TAC-8 week TAC
pairwise	miR-name	fold-change(log2 8-week_TAC/4-week_TAC)	p-value	sig-lable
4-week_TAC-8-week_TAC	mmu-miR-709	2.54899	5.88587e-18	**
4-week_TAC-8-week_TAC	mmu-miR-6538	1.66362	1.5735e-19	**
4-week_TAC-8-week_TAC	mmu-miR-6516-3p	1.45305	0.133675
4-week_TAC-8-week_TAC	mmu-miR-690	1.23642	4.70374e-11	**
4-week_TAC-8-week_TAC	mmu-miR-27b-5p	1.03802	0.191429
4-week_TAC-8-week_TAC	mmu-miR-712-5p	0.845313	0.36273
4-week_TAC-8-week_TAC	mmu-miR-7225-5p	0.815625	0.238686
4-week_TAC-8-week_TAC	mmu-miR-6240	0.793634	1.7561e-23
4-week_TAC-8-week_TAC	mmu-miR-3470a	0.753092	3.00224e-12
4-week_TAC-8-week_TAC	mmu-miR-5126	0.716089	0.395554
4-week_TAC-8-week_TAC	mmu-miR-3471	0.594394	0.190962
4-week_TAC-8-week_TAC	mmu-miR-466i-5p	0.45302	0.316632
4-week_TAC-8-week_TAC	mmu-miR-3473e	0.342852	0.470058
4-week_TAC-8-week_TAC	mmu-miR-3470b	0.327514	0.0274473
4-week_TAC-8-week_TAC	mmu-miR-299a-5p	0.207897	0.770864
4-week_TAC-8-week_TAC	mmu-miR-100-5p	0.131129	0.721374
4-week_TAC-8-week_TAC	mmu-miR-1949	0.131075	0.801499
4-week_TAC-8-week_TAC	mmu-miR-3535	0.0969298	0.814368
4-week_TAC-8-week_TAC	mmu-miR-148a-3p	0.00944009	0.962038
4-week_TAC-8-week_TAC	mmu-miR-3473b	-0.027581	0.930518
4-week_TAC-8-week_TAC	mmu-let-7d-5p	-0.0839321	0.0404145
4-week_TAC-8-week_TAC	mmu-miR-345-5p	-0.0994862	0.880844
4-week_TAC-8-week_TAC	mmu-miR-1a-2-5p	-0.106354	0.820493
4-week_TAC-8-week_TAC	mmu-miR-511-3p	-0.106354	0.820493
4-week_TAC-8-week_TAC	mmu-miR-126a-3p	-0.113989	0.812776
4-week_TAC-8-week_TAC	mmu-miR-133b-3p	-0.127047	0.411835
4-week_TAC-8-week_TAC	mmu-miR-1940	-0.12889	0.505103
4-week_TAC-8-week_TAC	mmu-miR-199a-5p	-0.131908	0.858774
4-week_TAC-8-week_TAC	mmu-let-7f-5p	-0.158652	1.90826e-40
4-week_TAC-8-week_TAC	mmu-let-7a-5p	-0.159877	1.17185e-15
4-week_TAC-8-week_TAC	mmu-miR-208a-3p	-0.168465	0.765017
4-week_TAC-8-week_TAC	mmu-miR-29b-3p	-0.17058	0.56453
4-week_TAC-8-week_TAC	mmu-let-7e-5p	-0.225025	0.00438985
4-week_TAC-8-week_TAC	mmu-let-7c-5p	-0.244341	4.42792e-82
4-week_TAC-8-week_TAC	mmu-miR-195a-5p	-0.283915	0.410298
4-week_TAC-8-week_TAC	mmu-miR-744-5p	-0.299022	0.342529
4-week_TAC-8-week_TAC	mmu-miR-223-3p	-0.324612	0.668649
4-week_TAC-8-week_TAC	mmu-miR-3064-5p	-0.324612	0.668649
4-week_TAC-8-week_TAC	mmu-miR-5121	-0.324612	0.668649
4-week_TAC-8-week_TAC	mmu-miR-146a-5p	-0.36054	0.381408
4-week_TAC-8-week_TAC	mmu-miR-27b-3p	-0.363352	0.0500902
4-week_TAC-8-week_TAC	mmu-miR-674-5p	-0.366378	0.265927
4-week_TAC-8-week_TAC	mmu-miR-151-5p	-0.37702	0.502674
4-week_TAC-8-week_TAC	mmu-miR-1194	-0.37702	0.64392
4-week_TAC-8-week_TAC	mmu-miR-208a-5p	-0.390834	0.298572
4-week_TAC-8-week_TAC	mmu-miR-221-3p	-0.416556	0.00502554
4-week_TAC-8-week_TAC	mmu-miR-486-5p	-0.447418	3.7158e-07
4-week_TAC-8-week_TAC	mmu-miR-3107-5p	-0.449681	3.21001e-07
4-week_TAC-8-week_TAC	mmu-let-7b-5p	-0.461621	3.01779e-111
4-week_TAC-8-week_TAC	mmu-let-7g-5p	-0.476645	6.02256e-27
4-week_TAC-8-week_TAC	mmu-miR-335-5p	-0.492543	0.441742
4-week_TAC-8-week_TAC	mmu-miR-29c-3p	-0.498227	1.05785e-05
4-week_TAC-8-week_TAC	mmu-miR-10b-5p	-0.502589	0.381933
4-week_TAC-8-week_TAC	mmu-miR-30b-5p	-0.518366	0.256597
4-week_TAC-8-week_TAC	mmu-miR-143-3p	-0.539535	1.63183e-12
4-week_TAC-8-week_TAC	mmu-miR-696	-0.546945	0.417413
4-week_TAC-8-week_TAC	mmu-miR-320-3p	-0.548297	1.81668e-15
4-week_TAC-8-week_TAC	mmu-miR-497-5p	-0.573425	0.0628877
4-week_TAC-8-week_TAC	mmu-miR-29a-3p	-0.575957	4.99513e-80
4-week_TAC-8-week_TAC	mmu-miR-342-3p	-0.576094	0.0288565
4-week_TAC-8-week_TAC	mmu-miR-30c-2-3p	-0.580115	0.0392603
4-week_TAC-8-week_TAC	mmu-miR-126a-5p	-0.586485	0.00679919
4-week_TAC-8-week_TAC	mmu-miR-99a-5p	-0.607009	5.08025e-05
4-week_TAC-8-week_TAC	mmu-miR-8094	-0.640055	0.277059
4-week_TAC-8-week_TAC	mmu-miR-17-3p	-0.640137	0.453491
4-week_TAC-8-week_TAC	mmu-miR-1839-5p	-0.648594	3.25255e-09
4-week_TAC-8-week_TAC	mmu-miR-125a-5p	-0.666007	5.1674e-07
4-week_TAC-8-week_TAC	mmu-miR-145a-5p	-0.68284	0.00556972
4-week_TAC-8-week_TAC	mmu-miR-128-3p	-0.685285	9.29168e-05
4-week_TAC-8-week_TAC	mmu-miR-221-5p	-0.698906	0.186832
4-week_TAC-8-week_TAC	mmu-miR-28a-3p	-0.698948	0.360389
4-week_TAC-8-week_TAC	mmu-miR-15a-5p	-0.698966	0.103566
4-week_TAC-8-week_TAC	mmu-miR-1981-5p	-0.698966	0.103566
4-week_TAC-8-week_TAC	mmu-miR-24-3p	-0.703312	3.60964e-17
4-week_TAC-8-week_TAC	mmu-miR-26b-5p	-0.707609	3.43639e-15
4-week_TAC-8-week_TAC	mmu-miR-26a-5p	-0.712398	1.21253e-15
4-week_TAC-8-week_TAC	mmu-miR-98-5p	-0.720968	0.154108
4-week_TAC-8-week_TAC	mmu-miR-185-5p	-0.725782	3.15326e-26
4-week_TAC-8-week_TAC	mmu-miR-152-3p	-0.73439	2.66754e-15
4-week_TAC-8-week_TAC	mmu-miR-125b-5p	-0.738757	2.63889e-12
4-week_TAC-8-week_TAC	mmu-miR-101b-3p	-0.739013	2.8927e-09
4-week_TAC-8-week_TAC	mmu-miR-200c-3p	-0.739649	0.289333
4-week_TAC-8-week_TAC	mmu-miR-30d-5p	-0.74059	6.31739e-20
4-week_TAC-8-week_TAC	mmu-miR-499-5p	-0.764376	3.9785e-57
4-week_TAC-8-week_TAC	mmu-miR-186-3p	-0.769338	0.413667
4-week_TAC-8-week_TAC	mmu-miR-329-3p	-0.769338	0.413667
4-week_TAC-8-week_TAC	mmu-miR-574-3p	-0.769338	0.413667
4-week_TAC-8-week_TAC	mmu-miR-101a-3p	-0.769649	1.1409e-29
4-week_TAC-8-week_TAC	mmu-miR-133a-3p	-0.770658	1.4517e-27
4-week_TAC-8-week_TAC	mmu-miR-25-5p	-0.792103	0.190465
4-week_TAC-8-week_TAC	mmu-miR-186-5p	-0.80998	0.155724
4-week_TAC-8-week_TAC	mmu-miR-31-5p	-0.80998	0.155724
4-week_TAC-8-week_TAC	mmu-miR-199a-3p	-0.823635	5.98324e-103
4-week_TAC-8-week_TAC	mmu-miR-199b-3p	-0.823635	5.98324e-103
4-week_TAC-8-week_TAC	mmu-miR-107-3p	-0.828085	1.4523e-40
4-week_TAC-8-week_TAC	mmu-miR-30e-3p	-0.828713	0.0550566
4-week_TAC-8-week_TAC	mmu-miR-199b-5p	-0.836452	0.261014
4-week_TAC-8-week_TAC	mmu-miR-378c	-0.838866	1.24141e-31
4-week_TAC-8-week_TAC	mmu-miR-23a-3p	-0.842151	4.73297e-19
4-week_TAC-8-week_TAC	mmu-miR-15b-5p	-0.846502	0.0868973
4-week_TAC-8-week_TAC	mmu-miR-23b-5p	-0.868873	0.170933
4-week_TAC-8-week_TAC	mmu-miR-222-3p	-0.868889	0.0156664
4-week_TAC-8-week_TAC	mmu-miR-143-5p	-0.894866	0.0940874
4-week_TAC-8-week_TAC	mmu-let-7i-5p	-0.928212	1.09504e-46
4-week_TAC-8-week_TAC	mmu-miR-27a-3p	-0.930749	6.89236e-06
4-week_TAC-8-week_TAC	mmu-miR-23b-3p	-0.937334	3.18099e-05
4-week_TAC-8-week_TAC	mmu-let-7d-3p	-0.940608	0.00156576
4-week_TAC-8-week_TAC	mmu-miR-1a-3p	-0.942264	0
4-week_TAC-8-week_TAC	mmu-miR-340-5p	-0.945118	0.000342413
4-week_TAC-8-week_TAC	mmu-miR-503-5p	-0.947768	9.01214e-05
4-week_TAC-8-week_TAC	mmu-miR-16-5p	-0.961987	4.92209e-07
4-week_TAC-8-week_TAC	mmu-miR-30c-5p	-0.961996	1.80291e-05
4-week_TAC-8-week_TAC	mmu-miR-194-5p	-0.962042	0.150622
4-week_TAC-8-week_TAC	mmu-miR-541-5p	-0.962065	0.23007
4-week_TAC-8-week_TAC	mmu-miR-106b-3p	-0.96212	0.365788
4-week_TAC-8-week_TAC	mmu-miR-1291	-0.96212	0.365788
4-week_TAC-8-week_TAC	mmu-miR-192-5p	-0.968737	5.59838e-24
4-week_TAC-8-week_TAC	mmu-miR-30e-5p	-0.97305	5.04677e-06
4-week_TAC-8-week_TAC	mmu-miR-378a-3p	-0.994903	4.87807e-282
4-week_TAC-8-week_TAC	mmu-miR-191-5p	-1.02323	1.83389e-46	**
4-week_TAC-8-week_TAC	mmu-miR-486-3p	-1.04122	1.40131e-06	**
4-week_TAC-8-week_TAC	mmu-miR-532-5p	-1.04947	0.0142838	*
4-week_TAC-8-week_TAC	mmu-miR-99b-5p	-1.05757	9.52828e-08	**
4-week_TAC-8-week_TAC	mmu-miR-30a-5p	-1.07404	1.21267e-50	**
4-week_TAC-8-week_TAC	mmu-miR-485-5p	-1.07746	0.129592
4-week_TAC-8-week_TAC	mmu-miR-130a-3p	-1.08064	0.000157737	**
4-week_TAC-8-week_TAC	mmu-miR-22-3p	-1.09692	1.71009e-25	**
4-week_TAC-8-week_TAC	mmu-miR-375-3p	-1.09957	0.158986
4-week_TAC-8-week_TAC	mmu-miR-331-3p	-1.11399	0.0506995
4-week_TAC-8-week_TAC	mmu-miR-374b-5p	-1.13191	0.196196
4-week_TAC-8-week_TAC	mmu-miR-676-3p	-1.13887	3.86336e-06	**
4-week_TAC-8-week_TAC	mmu-miR-92a-3p	-1.14785	1.39368e-05	**
4-week_TAC-8-week_TAC	mmu-miR-150-5p	-1.16358	0.029565	*
4-week_TAC-8-week_TAC	mmu-miR-322-3p	-1.19713	3.45251e-20	**
4-week_TAC-8-week_TAC	mmu-miR-22-5p	-1.19906	0.00725668	**
4-week_TAC-8-week_TAC	mmu-miR-451a	-1.2076	1.29785e-28	**
4-week_TAC-8-week_TAC	mmu-miR-106b-5p	-1.22498	0.0205341	*
4-week_TAC-8-week_TAC	mmu-miR-151-3p	-1.24212	0.00506515	**
4-week_TAC-8-week_TAC	mmu-miR-127-3p	-1.2515	0.0243736	*
4-week_TAC-8-week_TAC	mmu-miR-140-3p	-1.27589	0	**
4-week_TAC-8-week_TAC	mmu-miR-33-5p	-1.28387	0.0289072	*
4-week_TAC-8-week_TAC	mmu-miR-210-3p	-1.28391	0.131026
4-week_TAC-8-week_TAC	mmu-miR-423-5p	-1.28392	1.97596e-28	**
4-week_TAC-8-week_TAC	mmu-miR-103-3p	-1.30547	5.18799e-145	**
4-week_TAC-8-week_TAC	mmu-miR-21a-5p	-1.32863	5.58971e-63	**
4-week_TAC-8-week_TAC	mmu-miR-133a-5p	-1.34048	3.50441e-05	**
4-week_TAC-8-week_TAC	mmu-miR-203-3p	-1.34058	0.0721901
4-week_TAC-8-week_TAC	mmu-miR-30a-3p	-1.35006	4.27822e-14	**
4-week_TAC-8-week_TAC	mmu-miR-181c-5p	-1.37702	0.0404464	*
4-week_TAC-8-week_TAC	mmu-miR-142-5p	-1.43373	4.8458e-11	**
4-week_TAC-8-week_TAC	mmu-miR-148b-3p	-1.44749	0.0475893	*
4-week_TAC-8-week_TAC	mmu-miR-434-3p	-1.46448	0.0267467	*
4-week_TAC-8-week_TAC	mmu-miR-322-5p	-1.48551	0.00871074	**
4-week_TAC-8-week_TAC	mmu-miR-139-3p	-1.51453	0.000201002	**
4-week_TAC-8-week_TAC	mmu-miR-181a-5p	-1.52014	2.87587e-39	**
4-week_TAC-8-week_TAC	mmu-miR-93-5p	-1.54692	0.000657368	**
4-week_TAC-8-week_TAC	mmu-miR-598-3p	-1.54695	0.0174934	*
4-week_TAC-8-week_TAC	mmu-miR-138-5p	-1.54695	0.192998
4-week_TAC-8-week_TAC	mmu-miR-17-5p	-1.54695	0.192998
4-week_TAC-8-week_TAC	mmu-miR-330-3p	-1.54695	0.192998
4-week_TAC-8-week_TAC	mmu-miR-382-3p	-1.54695	0.192998
4-week_TAC-8-week_TAC	mmu-miR-92b-3p	-1.54695	0.192998
4-week_TAC-8-week_TAC	mmu-miR-181b-5p	-1.56417	1.95174e-26	**
4-week_TAC-8-week_TAC	mmu-miR-34c-5p	-1.57496	3.21624e-09	**
4-week_TAC-8-week_TAC	mmu-miR-181d-5p	-1.58043	7.00667e-18	**
4-week_TAC-8-week_TAC	mmu-miR-146b-5p	-1.67473	3.44343e-06	**
4-week_TAC-8-week_TAC	mmu-miR-365-3p	-1.69909	0.0641148
4-week_TAC-8-week_TAC	mmu-miR-10a-5p	-1.72194	7.9276e-41	**
4-week_TAC-8-week_TAC	mmu-miR-132-3p	-1.73427	1.44808e-34	**
4-week_TAC-8-week_TAC	mmu-miR-872-5p	-1.73961	0.00268035	**
4-week_TAC-8-week_TAC	mmu-miR-25-3p	-1.75267	9.67536e-80	**
4-week_TAC-8-week_TAC	mmu-miR-149-3p	-1.76934	0.118946
4-week_TAC-8-week_TAC	mmu-miR-215-5p	-1.76934	0.118946
4-week_TAC-8-week_TAC	mmu-miR-214-3p	-1.83647	0.000237606	**
4-week_TAC-8-week_TAC	mmu-miR-122-5p	-1.86012	3.39401e-05	**
4-week_TAC-8-week_TAC	mmu-miR-669c-5p	-1.86887	0.0139125	*
4-week_TAC-8-week_TAC	mmu-miR-139-5p	-1.92544	3.55518e-05	**
4-week_TAC-8-week_TAC	mmu-miR-204-5p	-1.96198	0.00858123	**
4-week_TAC-8-week_TAC	mmu-miR-433-3p	-1.96198	0.0720536
4-week_TAC-8-week_TAC	mmu-miR-664-5p	-2.04945	0.00524499	**
4-week_TAC-8-week_TAC	mmu-miR-144-5p	-2.06891	1.83929e-07	**
4-week_TAC-8-week_TAC	mmu-miR-490-3p	-2.18451	0.00886082	**
4-week_TAC-8-week_TAC	mmu-miR-181a-2-3p	-2.54736	0.0762681
4-week_TAC-8-week_TAC	mmu-miR-145a-3p	-2.66242	0.0049073	**
4-week_TAC-8-week_TAC	mmu-miR-345-3p	-2.70612	2.07921e-11	**
4-week_TAC-8-week_TAC	mmu-miR-379-5p	-3.13232	0.0132105	*
4-week_TAC-8-week_TAC	mmu-miR-350-3p	-3.28432	0.00724873	**
4-week_TAC-8-week_TAC	mmu-miR-144-3p	-3.54736	0.00214584	**
4-week_TAC-8-week_TAC	mmu-miR-99b-3p	-3.66283	0.00115939	**
4-week_TAC-8-week_TAC	mmu-miR-1964-3p	-6.67582	0.0171239	*
4-week_TAC-8-week_TAC	mmu-miR-200b-5p	-6.67582	0.0171239	*
4-week_TAC-8-week_TAC	mmu-miR-362-3p	-6.67582	0.0171239	*
4-week_TAC-8-week_TAC	mmu-miR-501-3p	-6.67582	0.0171239	*
4-week_TAC-8-week_TAC	mmu-miR-365-2-5p	-7.26078	0.00222619	**
4-week_TAC-8-week_TAC	mmu-miR-3095-3p	-7.41278	0.00112776	**
